# Supplementary material for: Syntheses, molecular structures and pH-dependent monomer–dimer equilibria of Dawson α2-monotitanium(iv)-substituted polyoxometalates
Source: Royal Society of Chemistry journal article supplement (doi:10.1039/b802410c), 2008-01-01
Supplement: b802410c.pdf [file b802410c.pdf]

**Electronic Supplementary Information** Ver. 2.02 (08-04-30)

---

**Syntheses, molecular structures and pH-dependent  
monomer-dimer equilibrium of Dawson  
 $\alpha_2$ -mono-titanium(IV)-substituted polyoxomatalates†**

---

**Shoko Yoshida, Hideyuki Murakami, Yoshitaka Sakai and Kenji**

**Nomiya\***

*Department of Materials Science, Faculty of Science, Kanagawa University, Hiratsuka,  
Kanagawa 259-1293, Japan. E-mail: [nomiya@kanagawa-u.ac.jp](mailto:nomiya@kanagawa-u.ac.jp)*

**Contents:**

**Fig. S1** pH-Varied  $^{31}\text{P}$  NMR of **DK-1** in water. These spectra indicate that the species in solution are the mono-protonated dimer at pH 0.5, the dimer at pH 1.0 and 1.5, the mixture of monomer and dimer at pH 3.0 and the monomer at pH 7.0.

**Fig. S2** pH-Varied  $^{31}\text{P}$  NMR of **DH-1** in water. These spectra indicate that the species in solution are the mono-protonated dimer at pH 0.5, the dimer at pH 1.1 – 3.0, and the monomer at pH 7.1.

**Fig. S3** pH-Varied  $^{31}\text{P}$  NMR of **MK-1** in water These spectra indicate that the species in solution are the mono-protonated dimer at pH 0.5, the dimer at pH 1.0 – 3.0, and the monomer at pH 6.0.

**Table S1** Average bond distances ( $\text{\AA}$ ) and angles ( $^\circ$ ) [range] for the Dawson POM **1a** in **DK-1**

**Table S2** Average bond distances ( $\text{\AA}$ ) and angles ( $^\circ$ ) [range] for the Dawson POM **1b** in **DH-1**

**Table S3** Bond valence sum (BVS) calculations of W(1-17), Ti, P(1, 2) and O atoms for the Dawson POM **1a** in **DK-1**

**Table S4** Bond valence sum (BVS) calculations of W(1-17), Ti, P(1, 2) and O atoms for the Dawson POM **1b** in **DH-1**

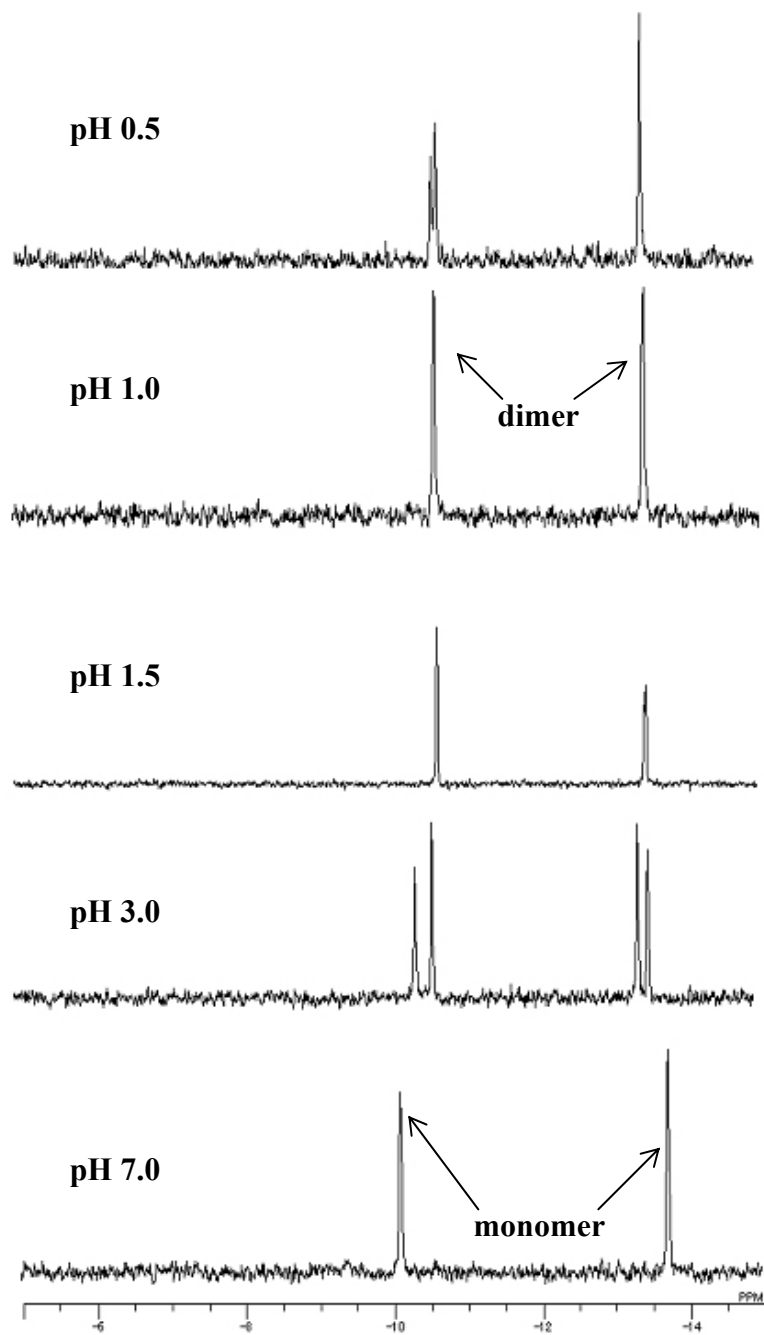

Fig. S1

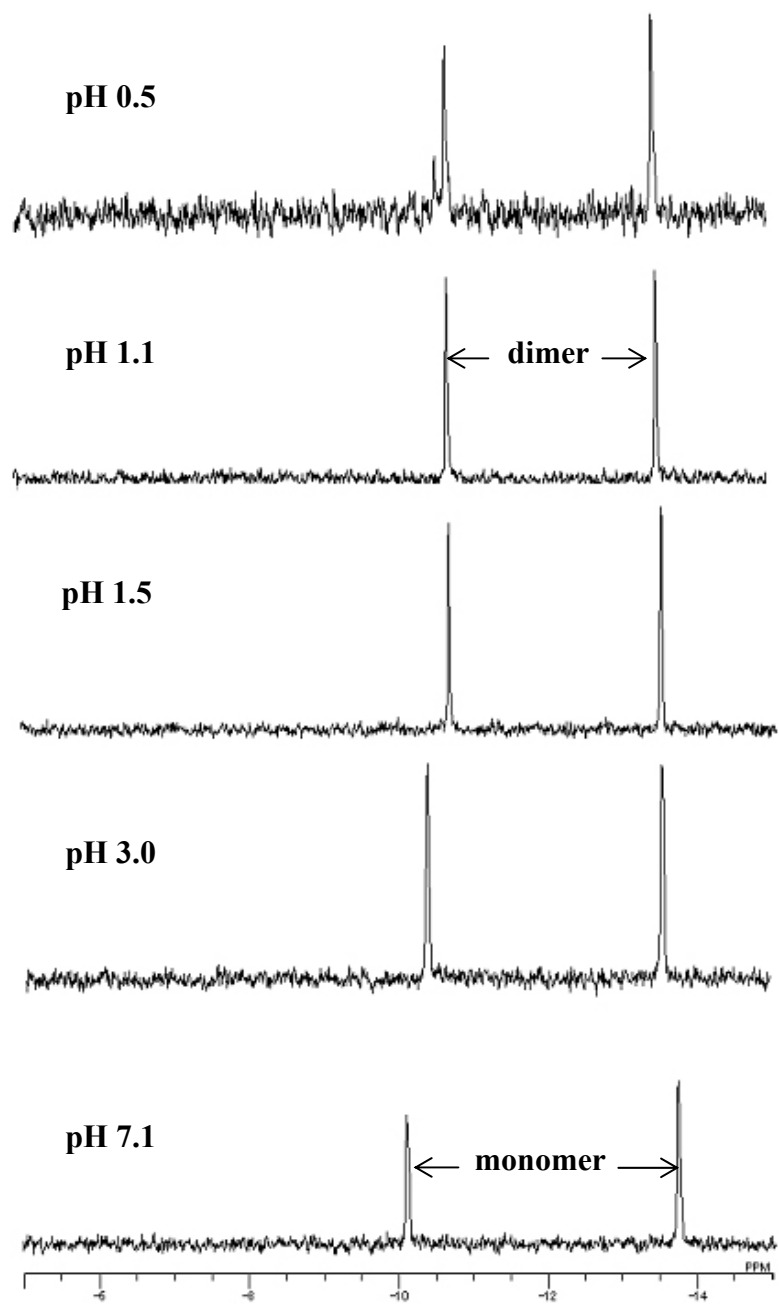

Fig. S2

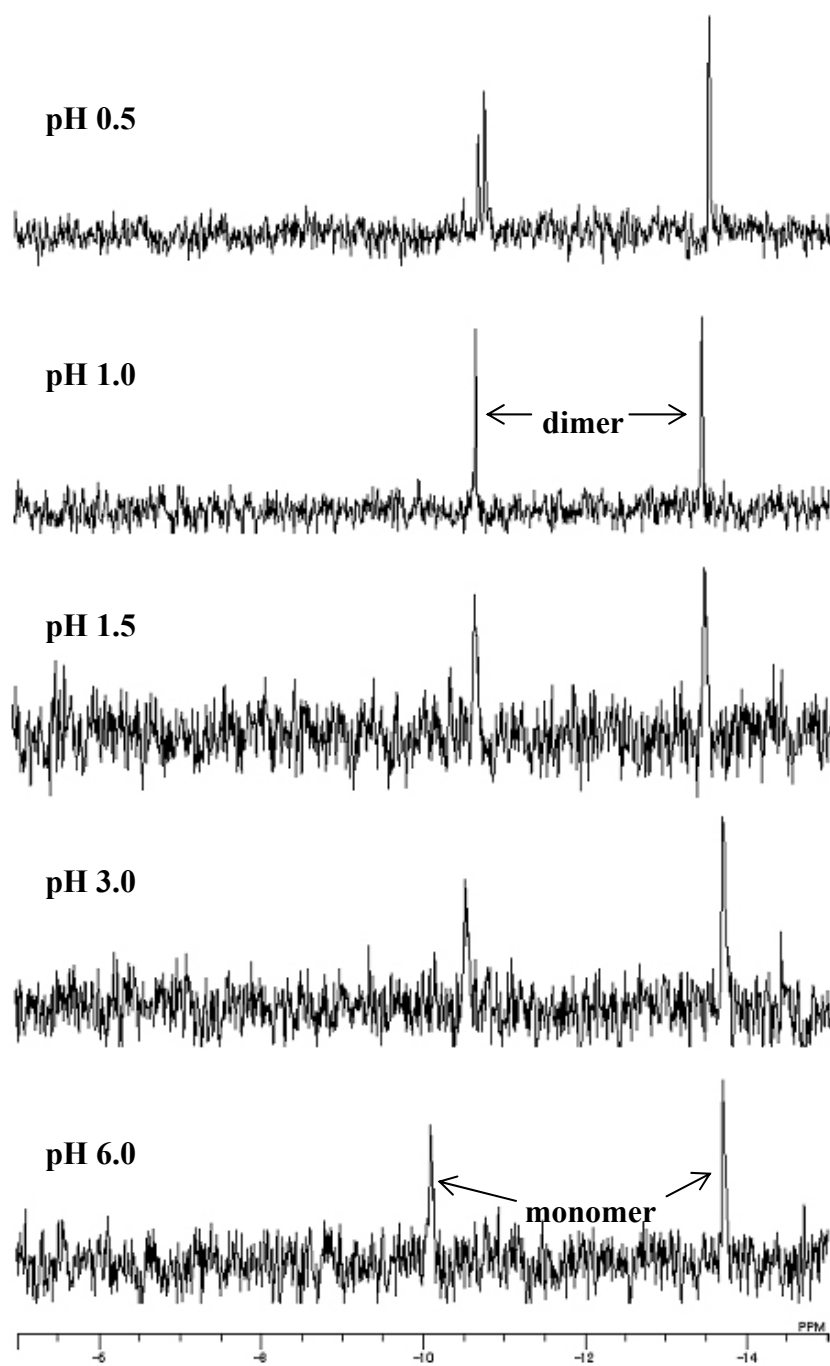

Fig. S3

**Table S1** Average bond distances (Å) and angles (o) [range] for the Dawson POM **1a** in **DK-1**

|                          | Cap W(1, 2, 3)                 | Cap W (16,17)                  | Ti (1)                         |
|--------------------------|--------------------------------|--------------------------------|--------------------------------|
| M-O(terminal)            | 1.707(16)[1.685(17)-1.728(16)] | 1.718(16)[1.690(16)-1.746(16)] | 1.803(7)                       |
| M-O(M cap)               | 1.927(17)[1.894(18)-1.959(17)] | 1.895(16)[1.833(16)-1.975(16)] | 1.941(18)[1.935(17)-1.947(18)] |
| M-O(W belt)              | 1.890(17)[1.820(17)-1.954(16)] | 1.915(17)[1.859(17)-1.953(16)] | 1.940(18)[1.923(17)-1.956(18)] |
| M-O(P)                   | 2.376(16)[2.333(16)-2.407(16)] | 2.365(17)[2.336(16)-2.394(17)] | 2.315(16)                      |
|                          | Tetrahedral P(1)O <sub>4</sub> | Tetrahedral P(2)O <sub>4</sub> |                                |
| P-O                      | 1.543(17)[1.518(17)-1.569(17)] | 1.542(17)[1.531(17)-1.565(17)] |                                |
| O-P-O angles             | 109.4(9)[106.5(9)-112.1(10)]   | 109.4(9)[105.9(9)-115.2(10)]   |                                |
|                          | Belt W(4 – 9)                  | Belt W(10 - 15)                |                                |
| W-O(terminal)            | 1.716(17)[1.670(16)-1.775(19)] | 1.716(17)[1.677(16)-1.747(16)] |                                |
| W-O(M cap)               | 1.939(16)[1.865(16)-2.007(16)] | 1.900(16)[1.828(17)-1.989(16)] |                                |
| W-O(W belt) <sup>a</sup> | 1.921(17)[1.901(16)-1.940(17)] | 1.925(17)[1.905(17)-1.954(16)] |                                |
| W-O(W belt) <sup>b</sup> | 1.900(16)[1.868(16)-1.923(16)] | 1.905(16)[1.887(17)-1.938(17)] |                                |
| W-O(W belt) <sup>c</sup> | 1.871(16)[1.820(16)-1.929(16)] | 1.933(16)[1.855(16)-2.009(17)] |                                |
| W-O(P)                   | 2.363(16)[2.302(16)-2.398(16)] | 2.353(16)[2.294(17)-2.391(17)] |                                |

<sup>a</sup> Edge sharing, between octahedra.  
<sup>b</sup> Corner sharing, same belt.  
<sup>c</sup> Corner sharing, between belts.

**Table S2** Average bond distances (Å) and angles (°) [range] for the Dawson POM **1b** in **DH-1**

| <b>For Dawson unit A</b> |                             |                             |                             |
|--------------------------|-----------------------------|-----------------------------|-----------------------------|
|                          | Cap W(1, 2, 3)              | Cap W (16,17)               | Ti (1)                      |
| M-O(terminal)            | 1.694(9)[1.679(8)-1.707(9)] | 1.699(8)[1.696(8)-1.701(8)] | 1.803(8)                    |
| M-O(M cap)               | 1.927(9)[1.901(9)-1.959(8)] | 1.946(8)[1.894(8)-2.003(8)] | 2.001(9)[1.984(9)-2.018(8)] |
| M-O(W belt)              | 1.886(8)[1.857(9)-1.913(8)] | 1.891(8)[1.853(8)-1.932(8)] | 1.890(9)[1.885(8)-1.894(9)] |
| M-O(P)                   | 2.378(8)[2.361(8)-2.392(8)] | 2.383(8)[2.377(8)-2.389(8)] | 2.304(8)                    |
|                          | Tetrahedral P(1A)O4         | Tetrahedral P(2A)O4         |                             |
| P-O                      | 1.535(9)[1.514(9)-1.568(8)] | 1.539(8)[1.526(8)-1.573(9)] |                             |
| O-P-O angles             | 109.4(5)[106.7(5)-112.0(5)] | 109.5(5)[107.2(5)-111.7(5)] |                             |
|                          | Belt W(4 – 9)               | Belt W(10 - 15)             |                             |
| W-O(terminal)            | 1.711(9)[1.707(9)-1.717(9)] | 1.711(9)[1.700(8)-1.724(9)] |                             |
| W-O(M cap)               | 1.938(8)[1.887(8)-1.980(8)] | 1.900(8)[1.839(8)-1.970(8)] |                             |
| W-O(W belt) <sup>a</sup> | 1.909(8)[1.890(8)-1.929(8)] | 1.912(8)[1.890(8)-1.939(8)] |                             |
| W-O(W belt) <sup>b</sup> | 1.896(8)[1.858(8)-1.921(8)] | 1.893(8)[1.872(8)-1.909(8)] |                             |
| W-O(W belt) <sup>c</sup> | 1.889(8)[1.824(8)-1.963(8)] | 1.913(8)[1.840(8)-1.986(8)] |                             |
| W-O(P)                   | 2.369(8)[2.352(8)-2.393(8)] | 2.362(8)[2.350(8)-2.378(8)] |                             |

<sup>a</sup> Edge sharing, between octahedra.  
<sup>b</sup> Corner sharing, same belt.  
<sup>c</sup> Corner sharing, between belts.

---

**For Dawson unit B**

---

|                          | Cap W(1, 2, 3)                  | Cap W (16,17)                   | Ti (1)                      |
|--------------------------|---------------------------------|---------------------------------|-----------------------------|
| M-O(terminal)            | 1.715(8)[1.712(8)-1.717(8)]     | 1.720(9)[1.712(8)-1.727(9)]     | 1.791(9)                    |
| M-O(M cap)               | 1.942(8)[1.889(8)-1.998(8)]     | 1.906(9)[1.846(8)-1.951(9)]     | 1.962(9)[1.955(9)-1.969(8)] |
| M-O(W belt)              | 1.943(8)[1.834(8)-1.916(8)]     | 1.908(8)[1.873(9)-1.944(8)]     | 1.906(9)[1.889(8)-1.923(9)] |
| M-O(P)                   | 2.381(8)[2.374(8)-2.385(8)]     | 2.372(8)[2.362(8)-2.381(8)]     | 2.263(8)                    |
|                          | Tetrahedral P(1B)O <sub>4</sub> | Tetrahedral P(2B)O <sub>4</sub> |                             |
| P-O                      | 1.542(9)[1.522(9)-1.571(9)]     | 1.541(9)[1.513(8)-1.591(9)]     |                             |
| O-P-O angles             | 109.4(5)[106.2(5)-112.4(5)]     | 109.5(5)[107.0(5)-111.9(5)]     |                             |
|                          | Belt W(4 – 9)                   | Belt W(10 - 15)                 |                             |
| W-O(terminal)            | 1.705(9)[1.693(9)-1.714(8)]     | 1.713(9)[1.704(8)-1.726(9)]     |                             |
| W-O(M cap)               | 1.943(8)[1.895(8)-1.994(8)]     | 1.896(8)[1.845(8)-1.947(9)]     |                             |
| W-O(W belt) <sup>a</sup> | 1.912(8)[1.890(8)-1.945(8)]     | 1.919(8)[1.901(8)-1.949(8)]     |                             |
| W-O(W belt) <sup>b</sup> | 1.897(8)[1.865(8)-1.916(8)]     | 1.896(8)[1.882(8)-1.909(8)]     |                             |
| W-O(W belt) <sup>c</sup> | 1.873(8)[1.832(8)-1.913(8)]     | 1.931(8)[1.872(8)-1.989(9)]     |                             |
| W-O(P)                   | 2.358(8)[2.319(8)-2.377(8)]     | 2.369(8)[2.348(8)-2.403(8)]     |                             |

<sup>a</sup> Edge sharing, between octahedra.

<sup>b</sup> Corner sharing, same belt.

<sup>c</sup> Corner sharing, between belts.

---



**Table S3** Bond valence sum (BVS) calculations of W(1-17), Ti, P(1, 2) and O atoms for the Dawson POM **1a** in **DK-1**

|       |       |       |       |       |       |       |       |
|-------|-------|-------|-------|-------|-------|-------|-------|
| O(1)  | 1.667 | O(29) | 2.150 | O(57) | 1.588 | W(1)  | 5.899 |
| O(2)  | 1.872 | O(30) | 2.080 | O(58) | 1.847 | W(2)  | 6.369 |
| O(3)  | 1.759 | O(31) | 2.137 | O(59) | 1.935 | W(3)  | 6.250 |
| O(4)  | 1.957 | O(32) | 2.078 | O(60) | 1.955 | W(4)  | 6.209 |
| O(5)  | 1.922 | O(33) | 2.094 | O(61) | 1.828 | W(5)  | 5.994 |
| O(6)  | 1.969 | O(34) | 2.097 | O(1X) | 2.063 | W(6)  | 5.930 |
| O(7)  | 2.026 | O(35) | 1.778 |       |       | W(7)  | 6.214 |
| O(8)  | 2.084 | O(36) | 1.703 |       |       | W(8)  | 6.323 |
| O(9)  | 1.943 | O(37) | 1.644 |       |       | W(9)  | 6.290 |
| O(10) | 2.039 | O(38) | 1.583 |       |       | W(10) | 6.150 |
| O(11) | 2.046 | O(39) | 1.726 |       |       | W(11) | 5.973 |
| O(12) | 2.056 | O(40) | 1.913 |       |       | W(12) | 6.006 |
| O(13) | 2.011 | O(41) | 2.000 |       |       | W(13) | 5.955 |
| O(14) | 1.949 | O(42) | 2.029 |       |       | W(14) | 6.004 |
| O(15) | 1.468 | O(43) | 1.938 |       |       | W(15) | 6.346 |
| O(16) | 1.472 | O(44) | 2.117 |       |       | W(16) | 6.175 |
| O(17) | 1.923 | O(45) | 1.938 |       |       | W(17) | 6.195 |
| O(18) | 1.807 | O(46) | 2.055 |       |       |       |       |
| O(19) | 1.774 | O(47) | 1.872 |       |       | P(1)  | 4.889 |
| O(20) | 1.998 | O(48) | 1.874 |       |       | P(2)  | 4.903 |
| O(21) | 2.109 | O(49) | 1.864 |       |       |       |       |
| O(22) | 1.929 | O(50) | 1.993 |       |       | Ti(1) | 4.145 |
| O(23) | 2.126 | O(51) | 1.955 |       |       |       |       |
| O(24) | 2.012 | O(52) | 1.892 |       |       |       |       |
| O(25) | 2.058 | O(53) | 2.006 |       |       |       |       |
| O(26) | 1.819 | O(54) | 2.018 |       |       |       |       |
| O(27) | 1.844 | O(55) | 1.960 |       |       |       |       |
| O(28) | 1.893 | O(56) | 2.007 |       |       |       |       |

**Table S4** Bond valence sum (BVS) calculations of W(1-17), Ti, P(1, 2) and O atomsfor the Dawson POM **1b** in **DH-1**

|        |       |        |       |        |       |        |       |
|--------|-------|--------|-------|--------|-------|--------|-------|
| (O1A)  | 1.903 | (O32A) | 2.14  | (O1B)  | 1.717 | (O32B) | 2.147 |
| (O2A)  | 1.764 | (O33A) | 2.114 | (O2B)  | 1.74  | (O33B) | 2.087 |
| (O3A)  | 1.822 | (O34A) | 2.086 | (O3B)  | 1.726 | (O34B) | 2.057 |
| (O4A)  | 2.014 | (O35A) | 1.736 | (O4B)  | 2.029 | (O35B) | 1.774 |
| (O5A)  | 1.937 | (O36A) | 1.764 | (O5B)  | 1.859 | (O36B) | 1.778 |
| (O6A)  | 1.909 | (O37A) | 1.685 | (O6B)  | 1.761 | (O37B) | 1.676 |
| (O7A)  | 1.988 | (O38A) | 1.798 | (O7B)  | 2.13  | (O38B) | 1.769 |
| (O8A)  | 2.019 | (O39A) | 1.698 | (O8B)  | 2.063 | (O39B) | 1.722 |
| (O9A)  | 1.996 | (O40A) | 1.798 | (O9B)  | 1.986 | (O40B) | 1.703 |
| (O10A) | 2.045 | (O41A) | 1.989 | (O10B) | 2.045 | (O41B) | 1.933 |
| (O11A) | 2.095 | (O42A) | 2.129 | (O11B) | 2.064 | (O42B) | 2.121 |
| (O12A) | 2.071 | (O43A) | 2.023 | (O12B) | 2.052 | (O43B) | 2.004 |
| (O13A) | 2.006 | (O44A) | 2.134 | (O13B) | 1.989 | (O44B) | 2.069 |
| (O14A) | 1.74  | (O45A) | 2.079 | (O14B) | 1.832 | (O45B) | 2.03  |
| (O15A) | 1.717 | (O46A) | 2.151 | (O15B) | 1.731 | (O46B) | 2.172 |
| (O16A) | 1.764 | (O47A) | 1.856 | (O16B) | 1.788 | (O47B) | 1.879 |
| (O17A) | 1.731 | (O48A) | 1.873 | (O17B) | 1.793 | (O48B) | 1.863 |
| (O18A) | 1.754 | (O49A) | 1.889 | (O18B) | 1.731 | (O49B) | 1.89  |
| (O19A) | 1.759 | (O50A) | 2.059 | (O19B) | 1.769 | (O50B) | 2.048 |
| (O20A) | 2.009 | (O51A) | 2.01  | (O20B) | 2.081 | (O51B) | 1.962 |
| (O21A) | 2.135 | (O52A) | 2.043 | (O21B) | 2.096 | (O52B) | 1.998 |
| (O22A) | 2.026 | (O53A) | 2.035 | (O22B) | 1.957 | (O53B) | 1.997 |
| (O23A) | 2.058 | (O54A) | 2.056 | (O23B) | 2.077 | (O54B) | 2.057 |
| (O24A) | 2.098 | (O55A) | 2.062 | (O24B) | 2.052 | (O55B) | 1.994 |
| (O25A) | 2.162 | (O56A) | 1.96  | (O25B) | 2.173 | (O56B) | 1.956 |
| (O26A) | 1.896 | (O57A) | 1.793 | (O26B) | 1.873 | (O57B) | 1.74  |
| (O27A) | 1.868 | (O58A) | 1.817 | (O27B) | 1.881 | (O58B) | 1.671 |
| (O28A) | 1.868 | (O59A) | 1.55  | (O28B) | 1.84  | (O59B) | 1.872 |
| (O29A) | 2.097 | (O60A) | 1.371 | (O29B) | 2.14  | (O60B) | 1.65  |
| (O30A) | 2.116 | (O61A) | 2.009 | (O30B) | 2.081 | (O61B) | 1.968 |
| (O31A) | 2.084 |        |       | (O31B) | 2.082 | (O1X)  | 2.1   |

---

|        |       |        |       |        |       |        |       |
|--------|-------|--------|-------|--------|-------|--------|-------|
| W(1A)  | 6.326 | W(12A) | 6.17  | W(6B)  | 6.145 | W(17B) | 6.032 |
| W(2A)  | 6.173 | W(13A) | 6.278 | W(7B)  | 6.26  |        |       |
| W(3A)  | 6.243 | W(14A) | 6.225 | W(8B)  | 6.195 | Ti(1A) | 4.147 |
| W(4A)  | 6.22  | W(15A) | 6.287 | W(9B)  | 6.344 | Ti(1B) | 4.276 |
| W(5A)  | 6.15  | W(16A) | 6.08  | W(10B) | 6.223 |        |       |
| W(6A)  | 6.187 | W(17A) | 6.122 | W(11B) | 6.133 | P(1A)  | 5.004 |
| W(7A)  | 6.143 | W(1B)  | 6.219 | W(12B) | 6.093 | P(2A)  | 4.942 |
| W(8A)  | 6.077 | W(2B)  | 6.112 | W(13B) | 6.117 | P(1B)  | 4.902 |
| W(9A)  | 6.153 | W(3B)  | 6.082 | W(14B) | 6.052 | P(2B)  | 4.932 |
| W(10A) | 6.179 | W(4B)  | 6.183 | W(15B) | 6.1   |        |       |
| W(11A) | 6.085 | W(5B)  | 6.172 | W(16B) | 6.22  |        |       |

---
